# Supplementary material for: Inhibition of Oxidative Neurotoxicity and Scopolamine-Induced Memory Impairment by γ-Mangostin: In Vitro and In Vivo Evidence
Source: Hindawi journal article supplement (doi:10.1155/2019/3640753), 2019-03-24

## Supplementary information

# **Inhibition of oxidative neurotoxicity and scopolamine-induced memory impairment by $\gamma$ -mangostin: *In vitro* and *in vivo* evidence**

Youngmun Lee<sup>#</sup>, Sunyoung Kim<sup>#</sup>, Yeonsoo Oh, Young-Mi Kim, Young-Won Chin and  
Jungsook Cho\*

*College of Pharmacy, Dongguk University-Seoul, Goyang, Gyeonggi-do 10326, Republic of Korea*

<sup>#</sup>These two authors contributed equally.

There are six figures depicting HPLC, <sup>1</sup>H-NMR, <sup>13</sup>C-NMR data of  $\alpha$ - and  $\gamma$ -mangostins, respectively.

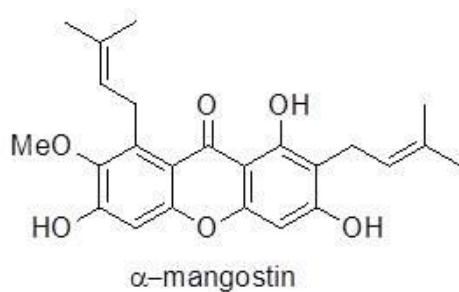

$\alpha$ -mangostin (1 mg/ml-Retention time: 42.4 min)

Column: tsk-gel ODS-80Ts ( TOSOH - 1 ml/min)

UV: 243 nm

Solvent: MeOH (A): water(B) - (A): 5%-5 min

(A): 5%-60%-10 min

(A): 60%-100%-35 min

(A): 100%-5%-1 min

(A): 5%-9 min

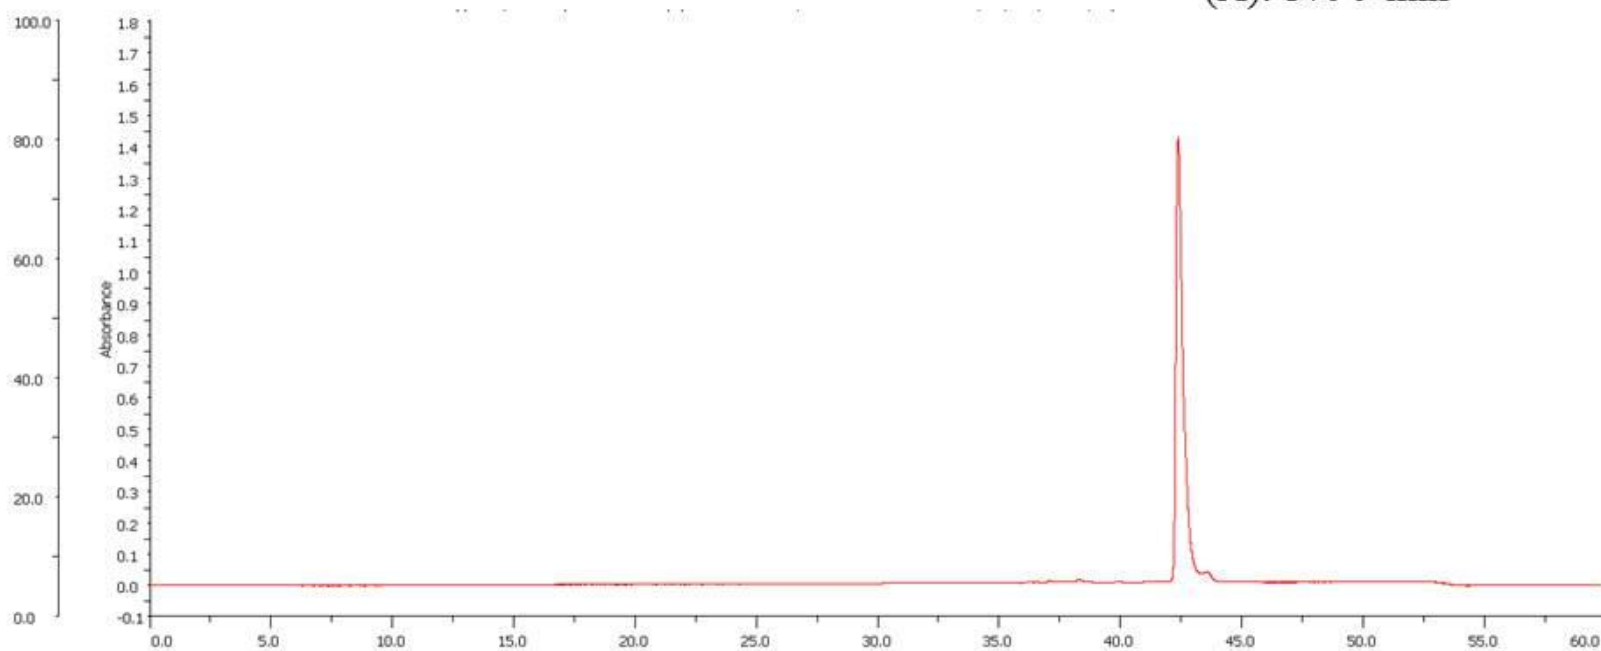

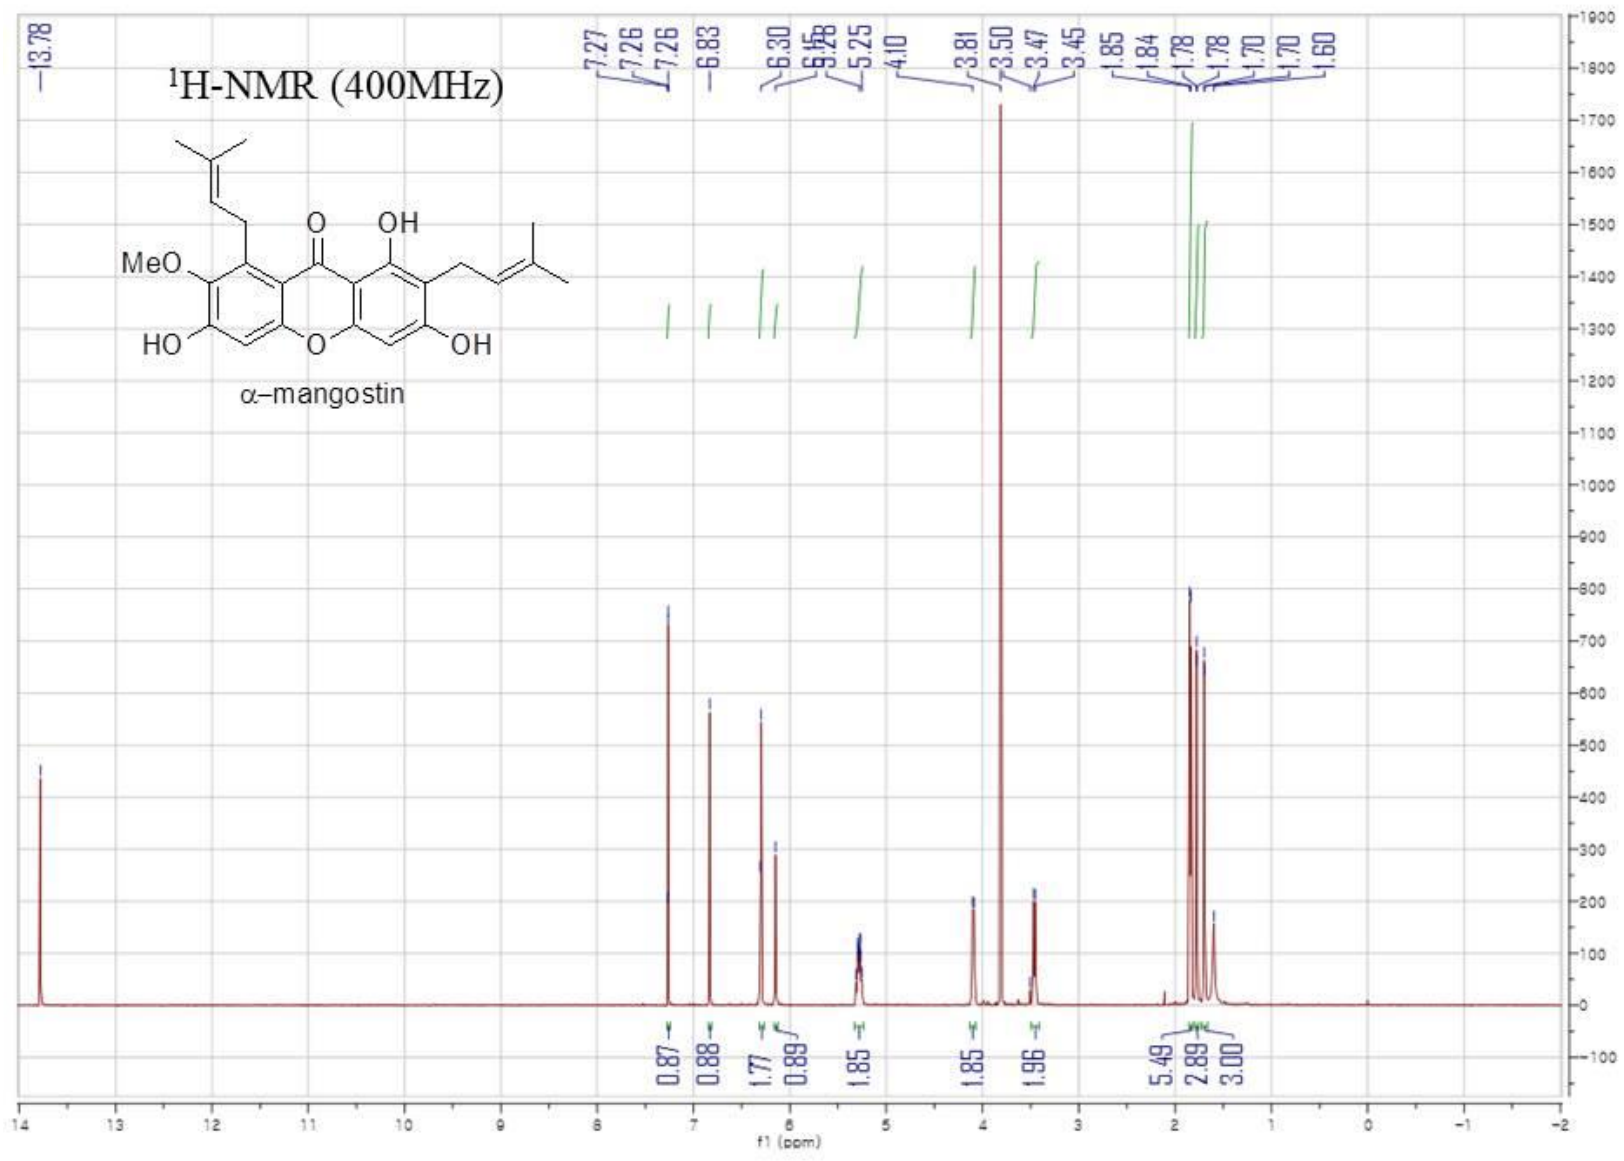

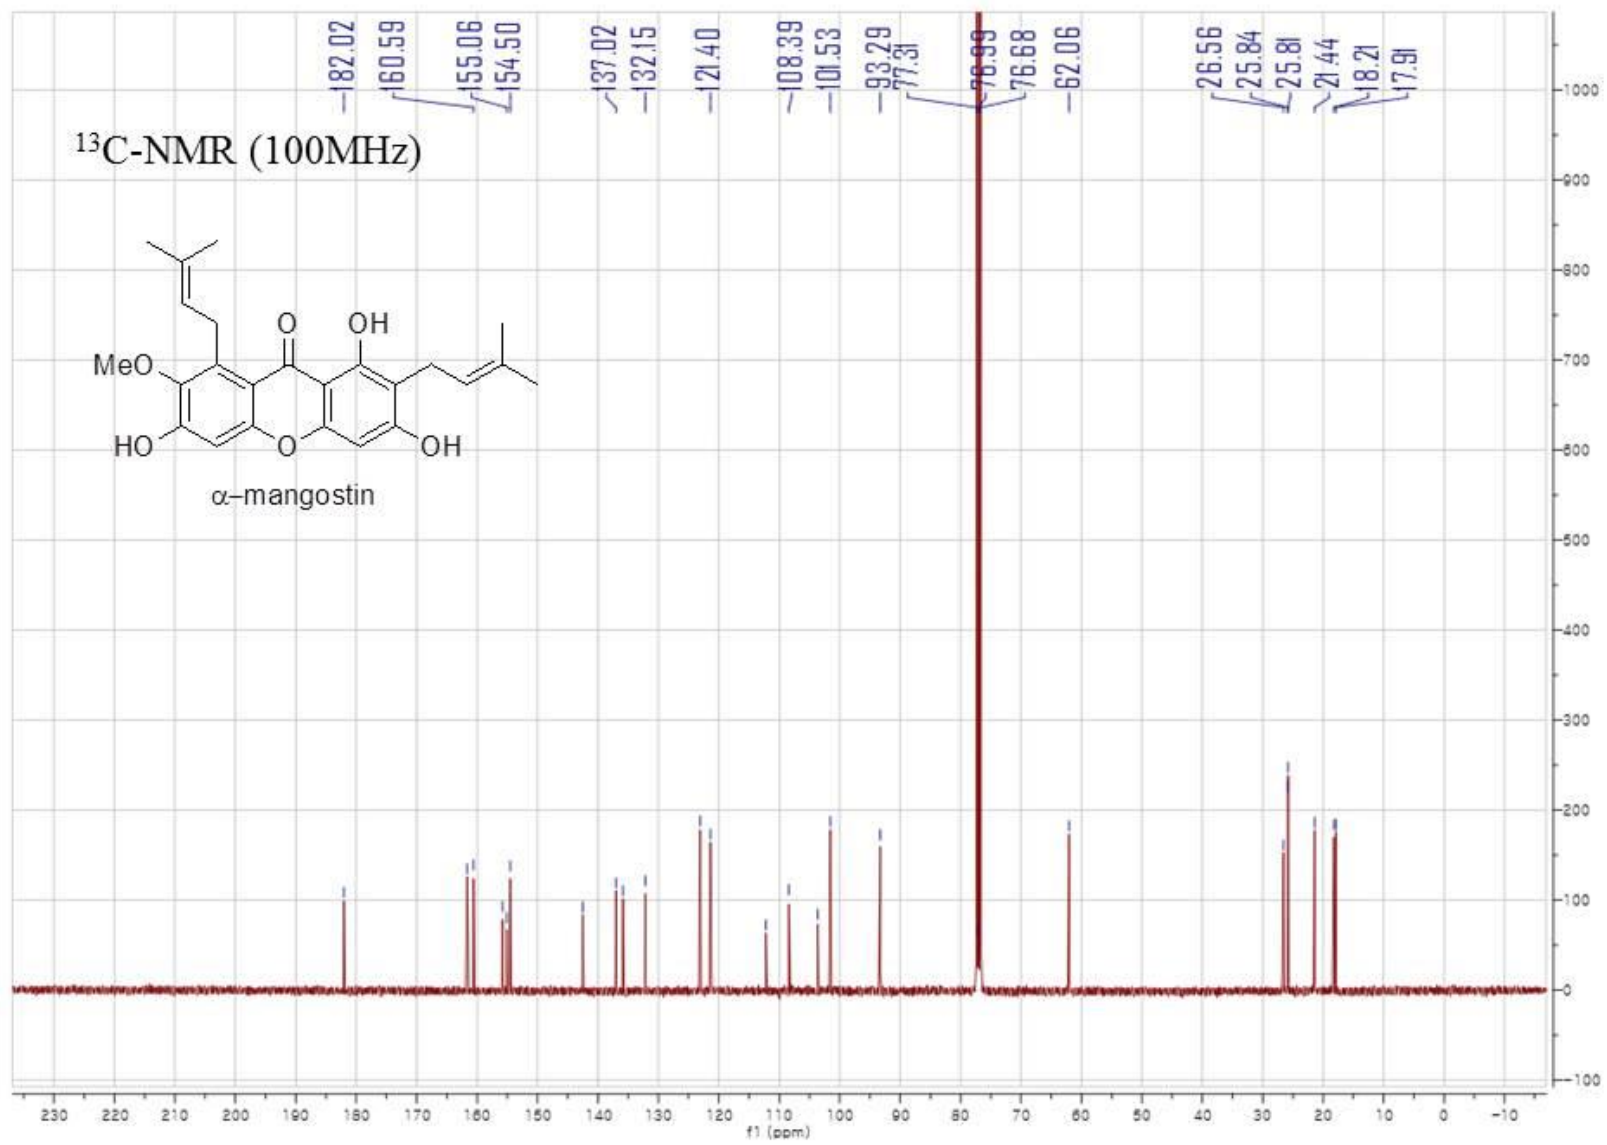

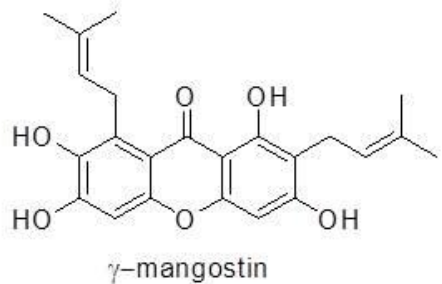

$\gamma$ -mangostin (1 mg/ml-Retention time: 38.7 min)

Column: tsk-gel ODS-80Ts (TOSOH - 1 ml/min)

UV: 243 nm

Solvent: MeOH (A): water(B) – (A): 5%-5 min

(A): 5%-60%-10 min

(A): 60%-100%-35 min

(A): 100%-5%-1 min

(A): 5%-9 min

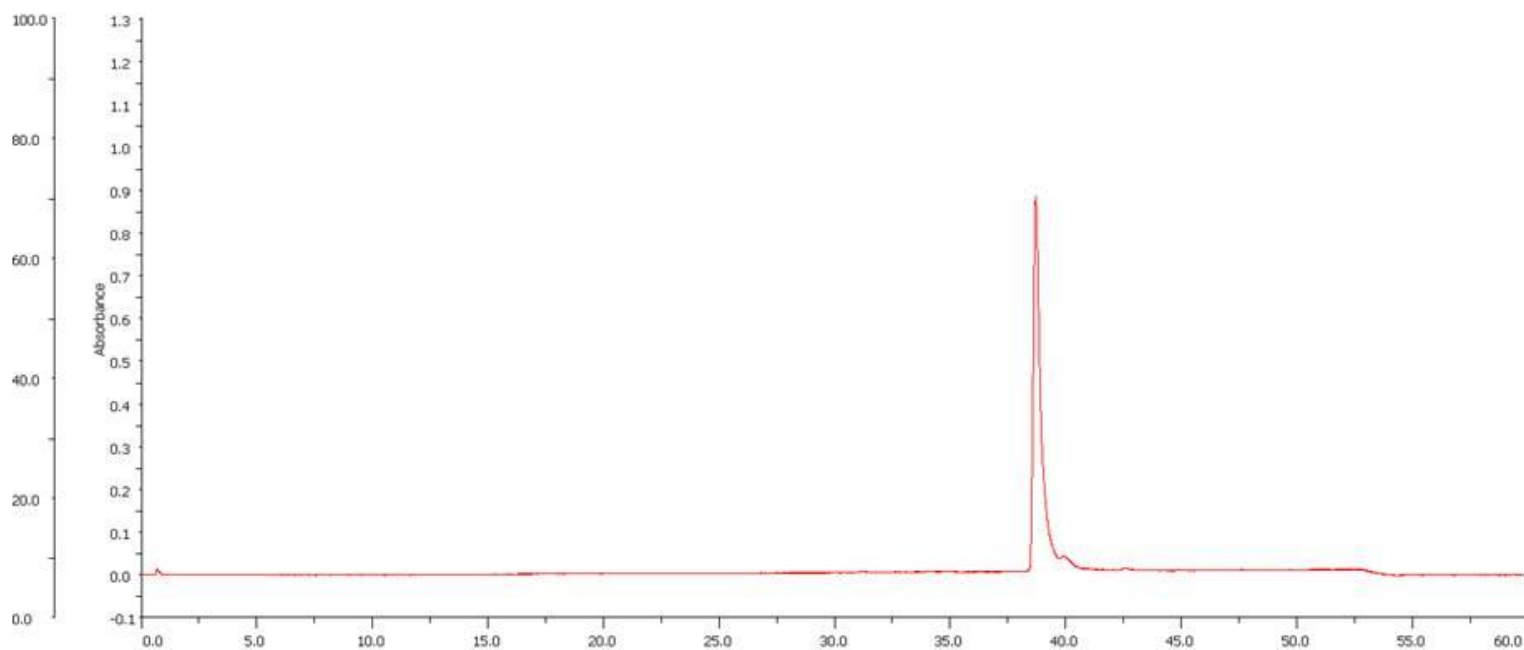

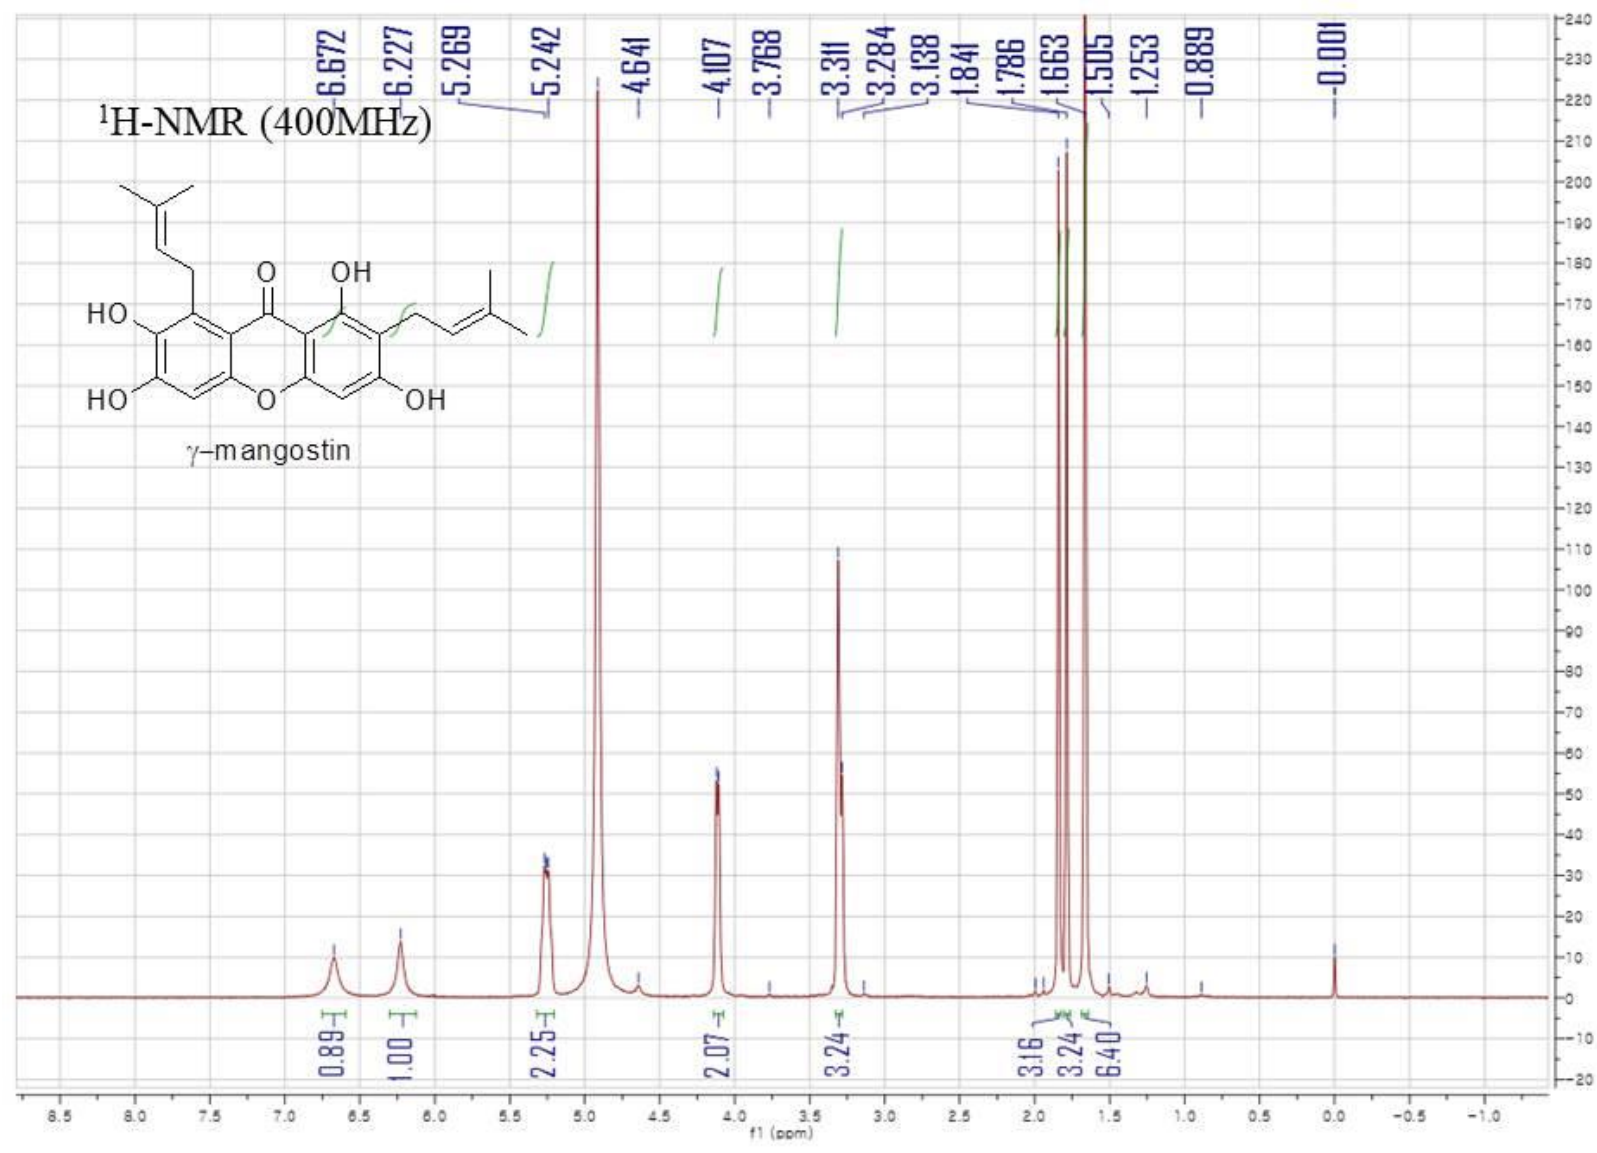

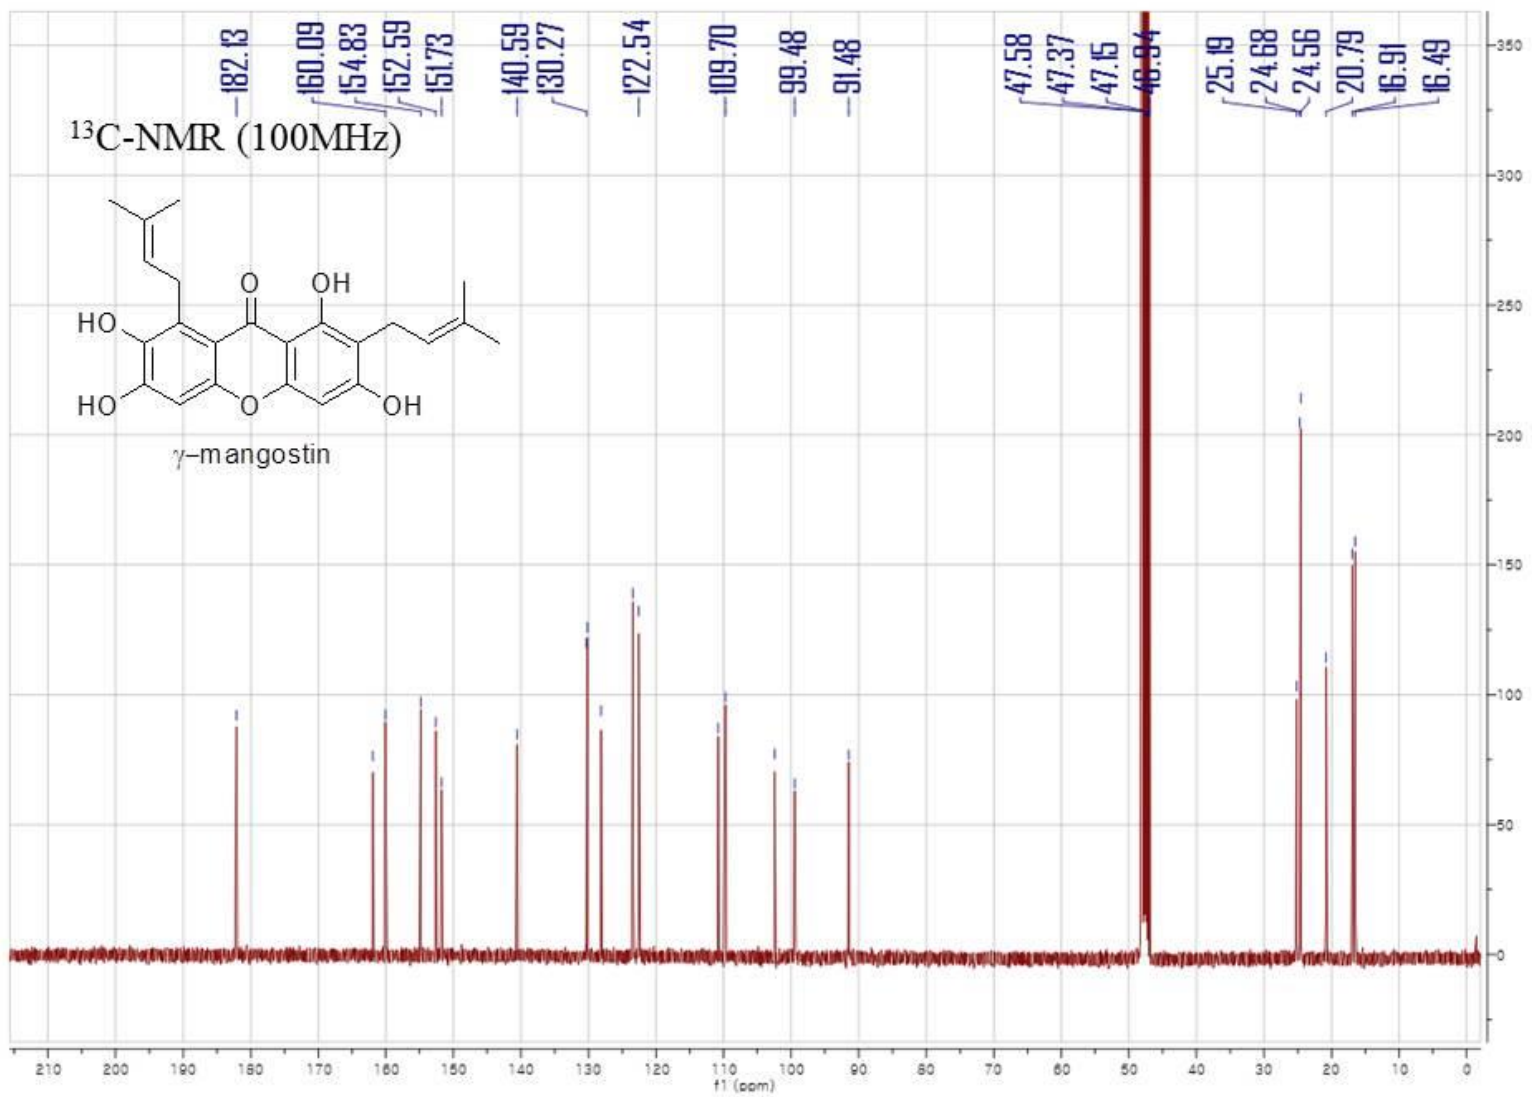

Supplement: f1 [file 3640753.f1.pdf]
